# Supplementary material for: Trichoderma harzianum Cellulase Gene thph2 Affects Trichoderma Root Colonization and Induces Resistance to Southern Leaf Blight in Maize
Source: MDPI journal article supplement (doi:10.3390/jof9121168), 2023-12-04
Supplement: s1 [file s1]

**Table S1.** Primers used in this study.

| Primer name | Sequence (5'-3'; restriction sites underlined) | Description                   |
|-------------|------------------------------------------------|-------------------------------|
| 18s-F       | CCTGCGGCTTAATTGACTC                            | qRT-PCR primer for 18s        |
| 18s-R       | GTTAGCAGGCTGAGGTCTCG                           | as reference                  |
| AOS-F       | TTCCTCCGCTACGACACATT                           | qRT-PCR primer for            |
| AOS-R       | CCGAGGGTGAGAGAGAAGTC                           | <i>ZmAOS</i>                  |
| HPL-F       | CCACACACGGGAGATAGCTA                           | qRT-PCR primer for            |
| HPL-R       | GAAGAACTCGTCCTGGCTCT                           | <i>ZmHPL</i>                  |
| LOX5-F      | TCGCGTCTACCGTTACGACTACTA                       | qRT-PCR primer for            |
| LOX5-R      | TTCAGGTTCAGCAGGAAAAGC                          | <i>LOX5</i>                   |
| OPR1-F      | CGTATGGGAGGCTGTTCTTG                           | qRT-PCR primer for            |
| OPR1-R      | AGCGGTCGTATTTGTTGAGTG                          | <i>OPR1</i>                   |
| ZmPR1-F     | GGCGAGAGCCCCTACTAGAC                           | qRT-PCR primer for            |
| ZmPR1-R     | AAATCGCCTGCATGGTTTTA                           | <i>ZmPR1</i>                  |
| ZmPR5-F     | GTCATCGACGGCTACAACCT                           | qRT-PCR primer for            |
| ZmPR5-R     | CACGGGCAGAAGGTGACT                             | <i>ZmPR5</i>                  |
| PAL-F       | GAAGCTCATGTCGTCCACCTA                          | qRT-PCR primer for <i>PAL</i> |
| PAL-R       | GTTTCATGGTCAGCACCTTCTT                         |                               |
